# Supplementary material for: Radiomic and Volumetric Measurements as Clinical Trial Endpoints—A Comprehensive Review
Source: MDPI journal article supplement (doi:10.3390/cancers14205076), 2022-10-17

## Supplementary Materials

### Supplementary Section S1: Search strategy

**PubMed search strategy:** Title and/or abstract including: ( (cancer[Title/Abstract]) OR tumor[Title/Abstract]) OR (tumor[Title/Abstract]) OR (oncology[Title/Abstract]) OR (oncological[Title/Abstract]) OR (malignant[Title/Abstract]) OR (malignancy[Title/Abstract]) ) AND ((radiomic[Title/Abstract]) OR (radiogenomic[Title/Abstract]) OR (volumetric[Title/Abstract]) OR (volume[Title/Abstract])) AND (computational[Title/Abstract]) OR (comput[Title/Abstract]) OR (model[Title/Abstract]) OR (machine[Title/Abstract]) OR (machine learning [Title/Abstract]) OR (deep learning[Title/Abstract]) OR (framework[Title/Abstract])) AND ((predict[Title/Abstract]) OR (prediction[Title/Abstract]) OR (predicts[Title/Abstract])) AND ((response[Title/Abstract]) OR (respond[Title/Abstract]) OR (RECIST[Title/Abstract]) OR (pathological[Title/Abstract]) OR (pathol\*[Title/Abstract]) OR (pathological response[Title/Abstract]) OR (survival[Title/Abstract]) OR (surviv\*[Title/Abstract]) OR (outcome[Title/Abstract]) OR (outcomes[Title/Abstract]) OR (PFS[Title/Abstract])).

### Supplementary Table S1: Study selection: inclusion/exclusion criteria

|                                                                           | Include                                                                                                                                                                     | Exclude                                                                                                                                                                                                                                                                                         |
|---------------------------------------------------------------------------|-----------------------------------------------------------------------------------------------------------------------------------------------------------------------------|-------------------------------------------------------------------------------------------------------------------------------------------------------------------------------------------------------------------------------------------------------------------------------------------------|
| Language                                                                  | English                                                                                                                                                                     | Non-English<br>Reviews                                                                                                                                                                                                                                                                          |
| Article type                                                              | Primary research papers only                                                                                                                                                | Systematic reviews<br>Opinion pieces                                                                                                                                                                                                                                                            |
| Study type                                                                | Observational studies (retrospective or prospective)<br>Interventional (retrospective or prospective)<br>Adults aged 18 or above<br>Solid tumors                            | Studies NOT involving human patients<br>Studies NOT involving radiological imaging of human patients                                                                                                                                                                                            |
| Population                                                                | Undergoing oncological treatment (any oncological treatments, i.e. systemic/RT/surgical/other)                                                                              | Non-malignant conditions<br>Age <18<br><br>Studies NOT involving radiomics or volumetric analysis<br>Studies NOT evaluating prediction of treatment response or outcome                                                                                                                         |
| ‘Intervention’ or ‘Test’ – in our case the imaging-based predictive model | Radiomic or radiogenomic models, or Models using tumor volumetric data based on CT/MRI/PET/US images<br>Type of model: machine learning model, or other statistical models. | Technical studies that use ML to improve e.g. segmentation accuracy, but do not aim to evaluate prediction of treatment response or outcome<br>Methodologies that do NOT allow prediction based on pre-treatment imaging alone (e.g. by using a combination of pre- and post-treatment imaging) |
| Comparison                                                                | RECIST – optional (but to be noted)?<br>Integration with clinical data – optional (but to be noted)?                                                                        |                                                                                                                                                                                                                                                                                                 |
| ‘Outcome’ – in our case outcome/success of predictive model               | Predicting response (decision re measures to include – any response markers, or only validated surrogate endpoints – pending further search)<br>Predicting PFS/OS           | Any papers that only predict OS, but no measures that relate specifically to the given line of treatment (e.g. path CR, PFS).                                                                                                                                                                   |

*Supplementary Section S2: Quality assessment method***Patient characteristics**

Histological subtype(s)

Any molecular selection criteria – e.g. specific mutations?

Any other specific inclusion/exclusion criteria of note

Line of treatment (e.g. first line or at recurrence etc)

**Study design and data set**

Retrospective vs prospective?

Sample size (n = )

Were sample size calculations done/included?

Single or multi-institution?

Internal validation? Yes/No

External validation? Yes/No

**Imaging information**

Modality (i.e. CT, MRI, PET, etc)

Comment on imaging analysis method (number of assessors/segmenting Radiologists)

**Other data types**

Clinical data included? Yes/No – If yes, what data types were included

Molecular data included? Yes/No – If yes, what was included

**Algorithm**

Type of algorithm

Algorithm made available?

What was predicted by the model? E.g. PFS, TTP, OS, pathological CR, etc

Model performance

What was model performance benchmarked against?

Raw data reported e.g. TN/FN/TP/FP contingency table?

Accuracy metrics reported? (include confidence intervals, p-values etc if reported. E.g.

- AUC/AUROC?
- F score or F1 score?
- Accuracy?
- Sensitivity, specificity?
- PPV/NPV?

**Comment on generalisability/reproducibility**

Has the model received regulatory approval, e.g. FDA approval? Yes/No

Supplementary Figure S1: Timeline of reviewed publications

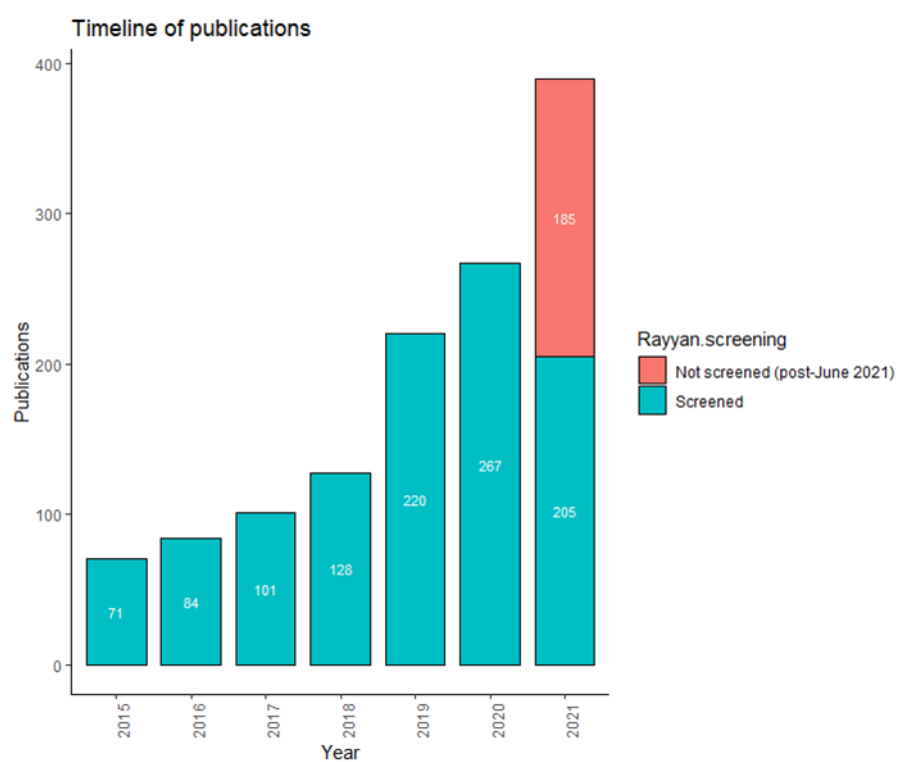

Supplement: s1 [file s1]
